# Supplementary material for: The Power of Gene-Based Rare Variant Methods to Detect Disease-Associated Variation and Test Hypotheses About Complex Disease
Source: PubMed Central journal article supplement (PMC4407972; doi:10.1371/journal.pgen.1005165), 2015-04-23

**S1 Figure: Pairwise linkage disequilibrium between variants in simulated vs. empirical data, for different minor allele frequency categories.**

**Mean pairwise LD plot for the GATA3 region, 0.5%<MAF<5%**

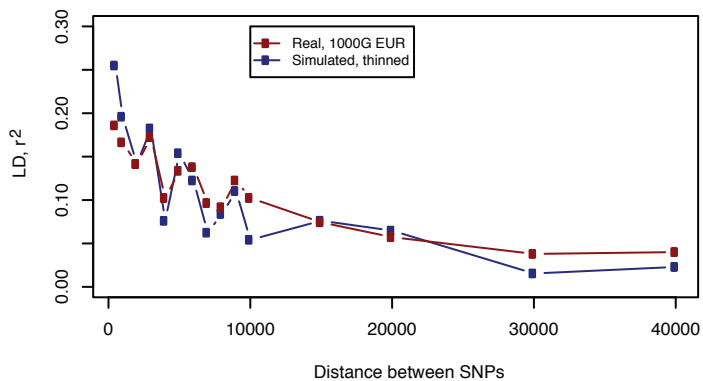

**Mean pairwise LD plot for the GATA3 region, 5%<MAF<10%**

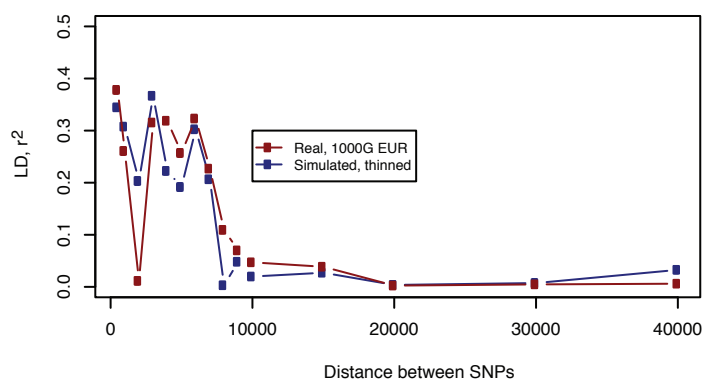

**Mean pairwise LD plot for the GATA3 region, 10%<MAF<30%**

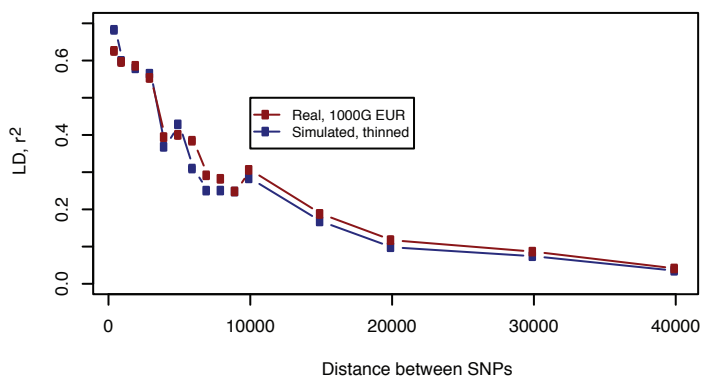

**Mean pairwise LD plot for the GATA3 region, 30%<MAF<50%**

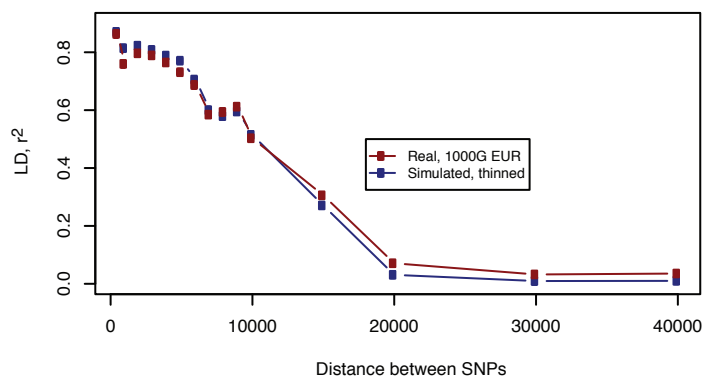

Supplement: pgen.1005165.s002.pdf [file pgen.1005165.s002.pdf]
