# Supplementary material for: The Power of Gene-Based Rare Variant Methods to Detect Disease-Associated Variation and Test Hypotheses About Complex Disease
Source: PubMed Central journal article supplement (PMC4407972; doi:10.1371/journal.pgen.1005165), 2015-04-23

**S2 Figure: Comparison of site frequency spectrum at 202 Nelson et al genes vs. all other REFSEQ genes.**

**Comparison of the full site frequency spectrum (all MAF) at Nelson et al genes vs. other REFSEQ genes:**

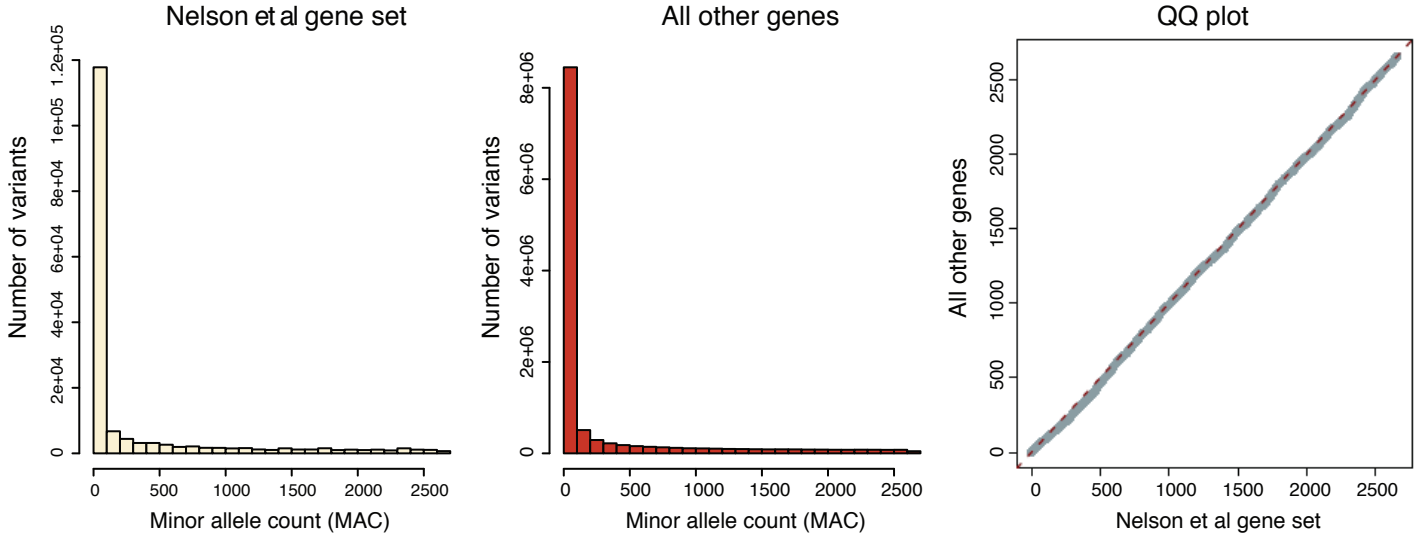

**Comparison of low frequency SFS (MAF<1% only) at Nelson et al genes vs. other REFSEQ genes:**

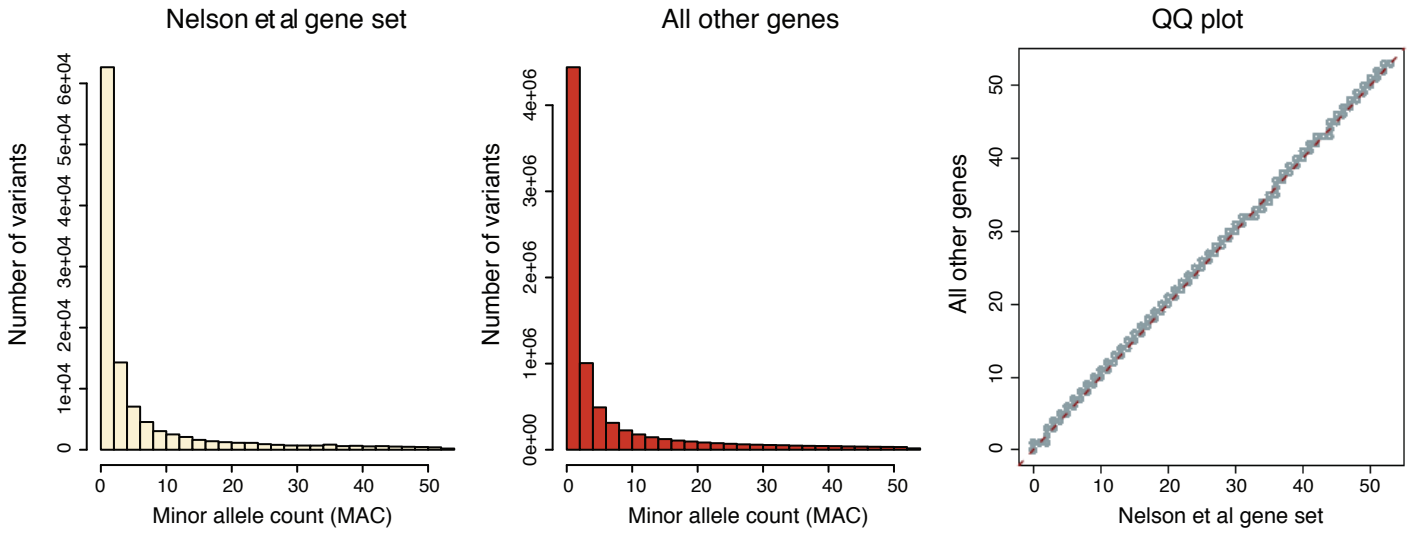

Supplement: pgen.1005165.s003.pdf [file pgen.1005165.s003.pdf]
