# Supplementary material for: The Power of Gene-Based Rare Variant Methods to Detect Disease-Associated Variation and Test Hypotheses About Complex Disease
Source: PubMed Central journal article supplement (PMC4407972; doi:10.1371/journal.pgen.1005165), 2015-04-23

S3 Figure: Variant frequency-effect size distributions under each simulated architecture.

A

AR1 (strong selection)

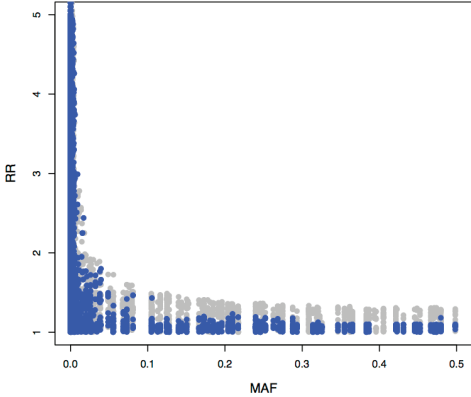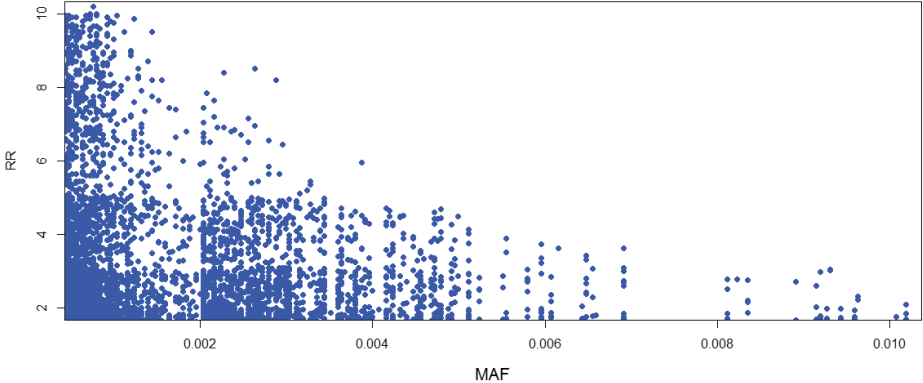

B

AR2 (moderate selection)

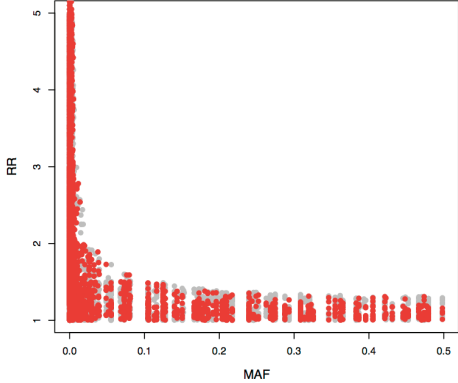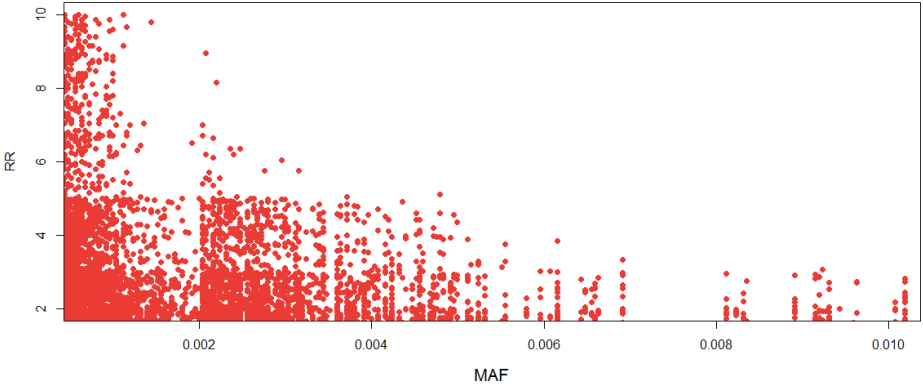

C

AR3 (weak selection)

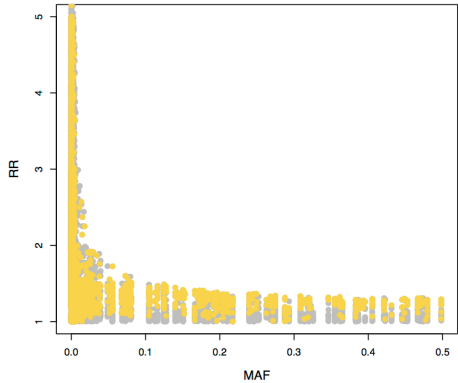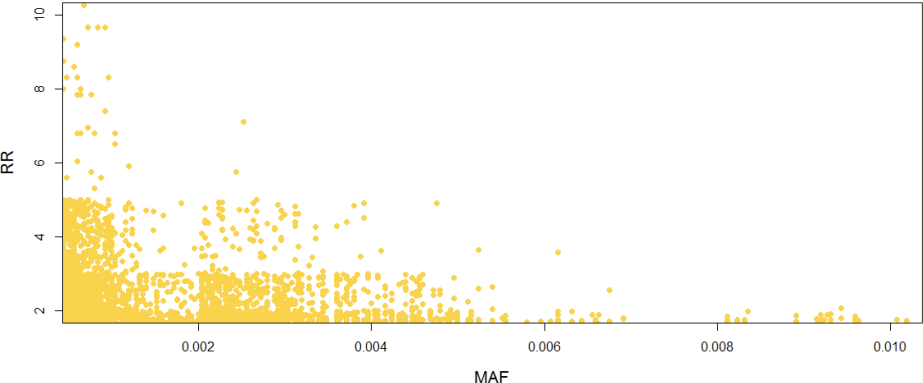

Supplement: pgen.1005165.s004.pdf [file pgen.1005165.s004.pdf]
