# Supplementary material for: The Power of Gene-Based Rare Variant Methods to Detect Disease-Associated Variation and Test Hypotheses About Complex Disease
Source: PubMed Central journal article supplement (PMC4407972; doi:10.1371/journal.pgen.1005165), 2015-04-23

**S4 Figure: Distribution of number of causal variants and total number of simulated variants tested per locus under different architectures.**

**A** Number of variants with assigned effects

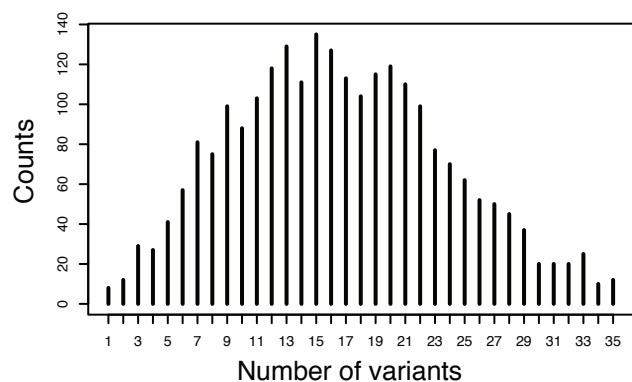

**B** Total number of variants tested

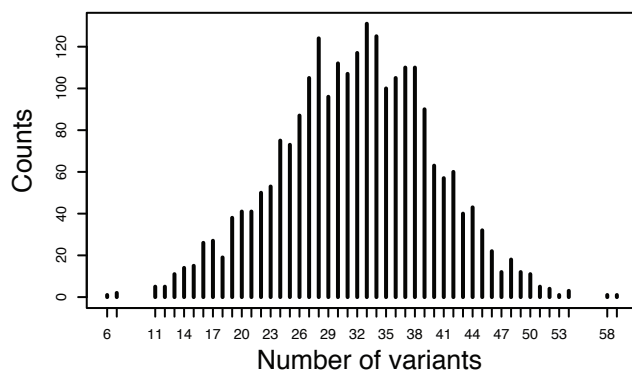

**C** Number of total segregating variants vs. number of causal variants under each architecture (VE=1%)

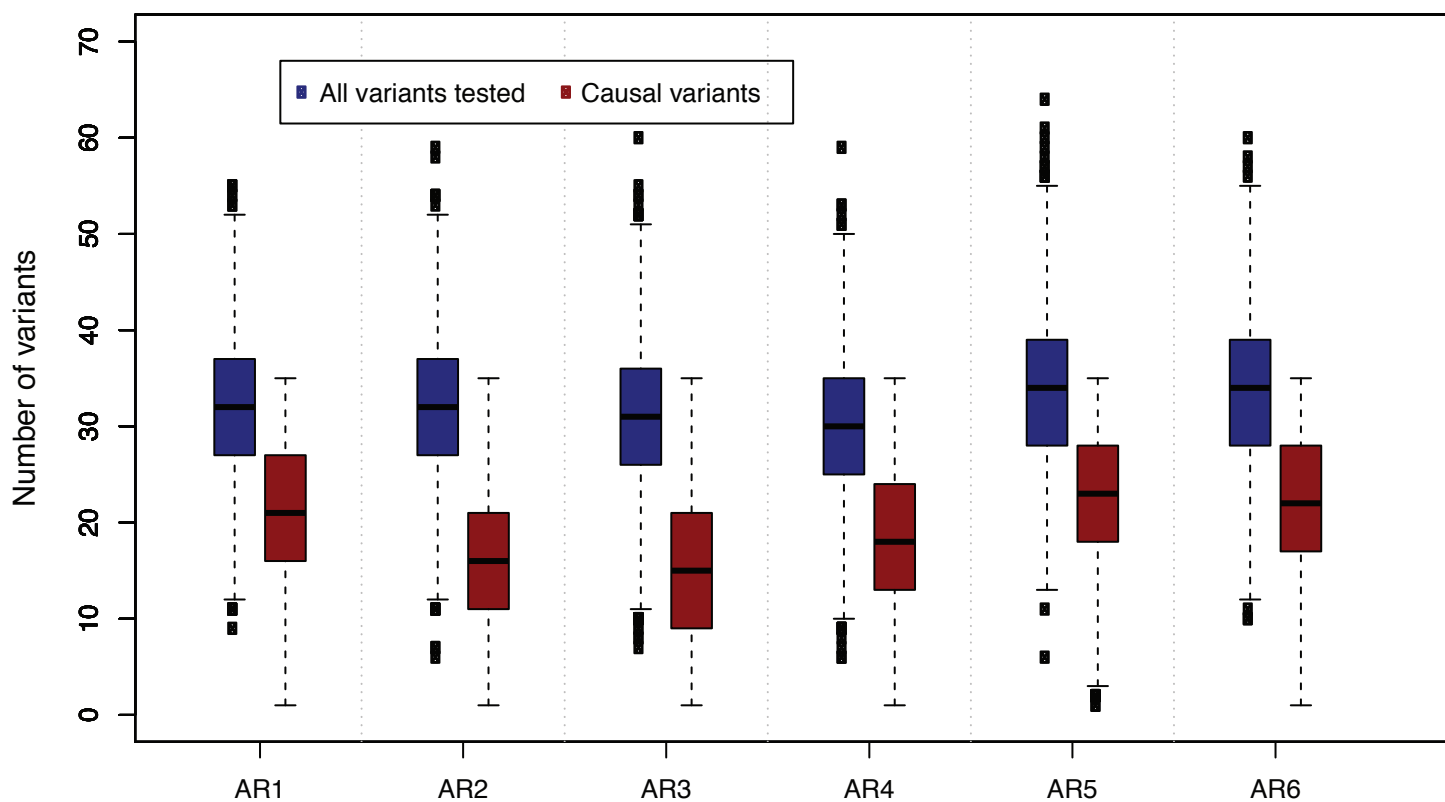

Supplement: pgen.1005165.s005.pdf [file pgen.1005165.s005.pdf]
