# Supplementary material for: The Power of Gene-Based Rare Variant Methods to Detect Disease-Associated Variation and Test Hypotheses About Complex Disease
Source: PubMed Central journal article supplement (PMC4407972; doi:10.1371/journal.pgen.1005165), 2015-04-23

S5 Figure: Power of gene-based under null locus architectures to assess type I error.

**A**

Type I error across simulated genes, alpha = 0.05

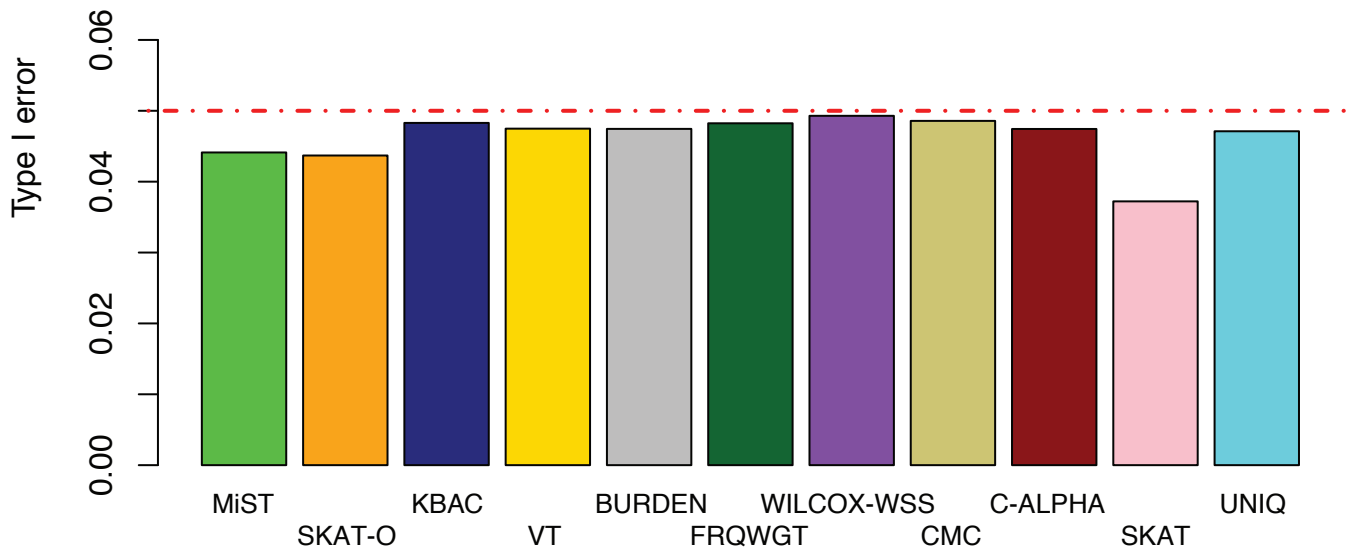

**B**

Type I error across simulated genes, alpha = 1e-04

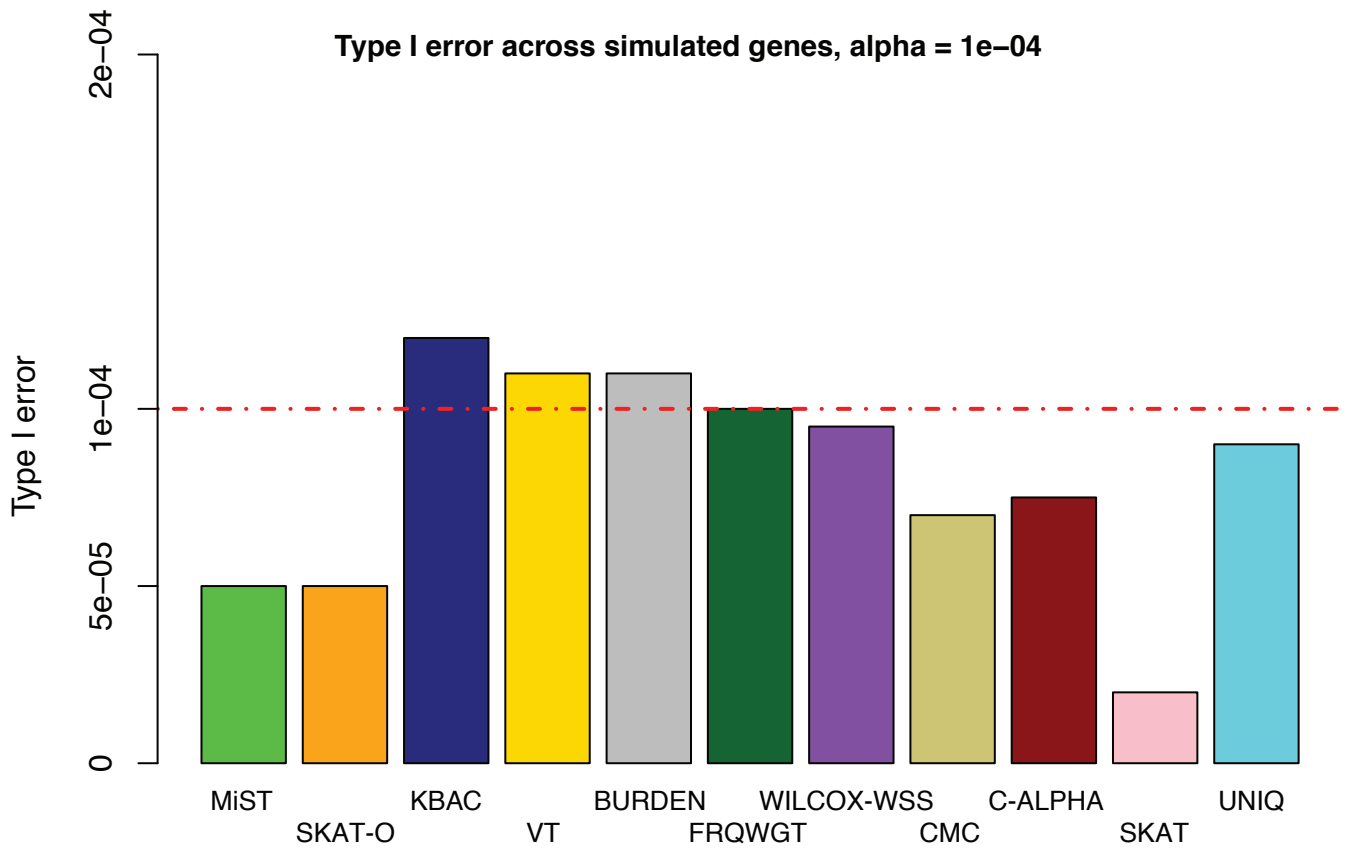

Supplement: pgen.1005165.s006.pdf [file pgen.1005165.s006.pdf]
