# Supplementary material for: The Power of Gene-Based Rare Variant Methods to Detect Disease-Associated Variation and Test Hypotheses About Complex Disease
Source: PubMed Central journal article supplement (PMC4407972; doi:10.1371/journal.pgen.1005165), 2015-04-23

**S6 Figure: Relative power of gene-based tests using an absolute significance threshold vs. an empirical threshold corrected for the false positive rate of each test.**

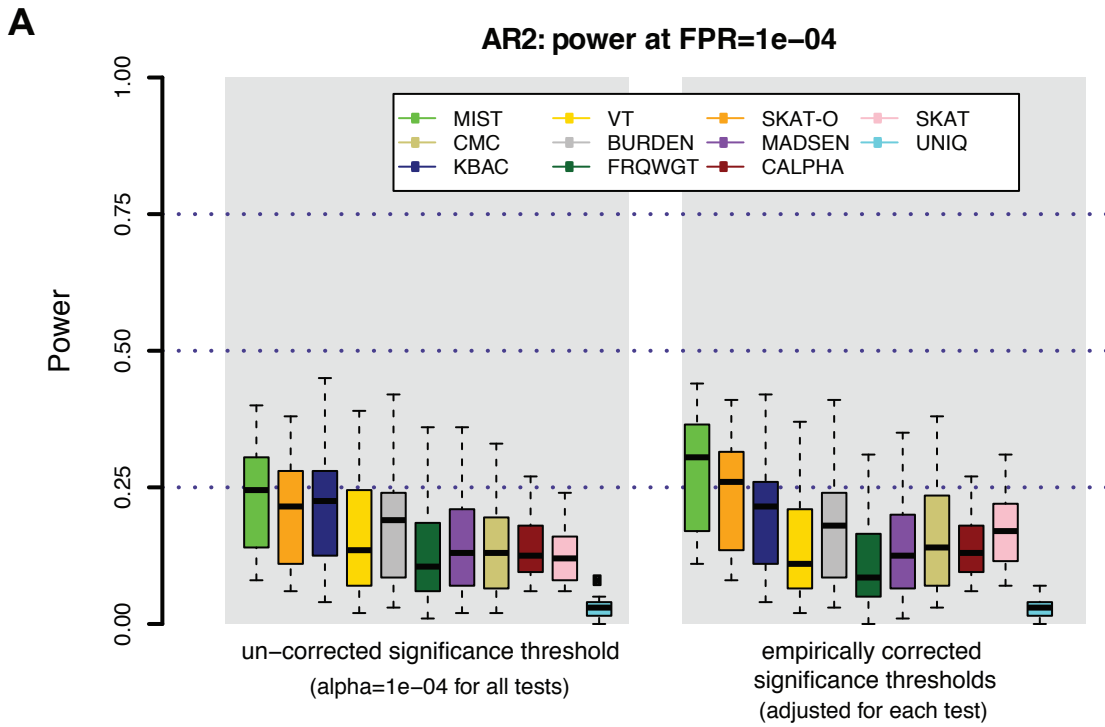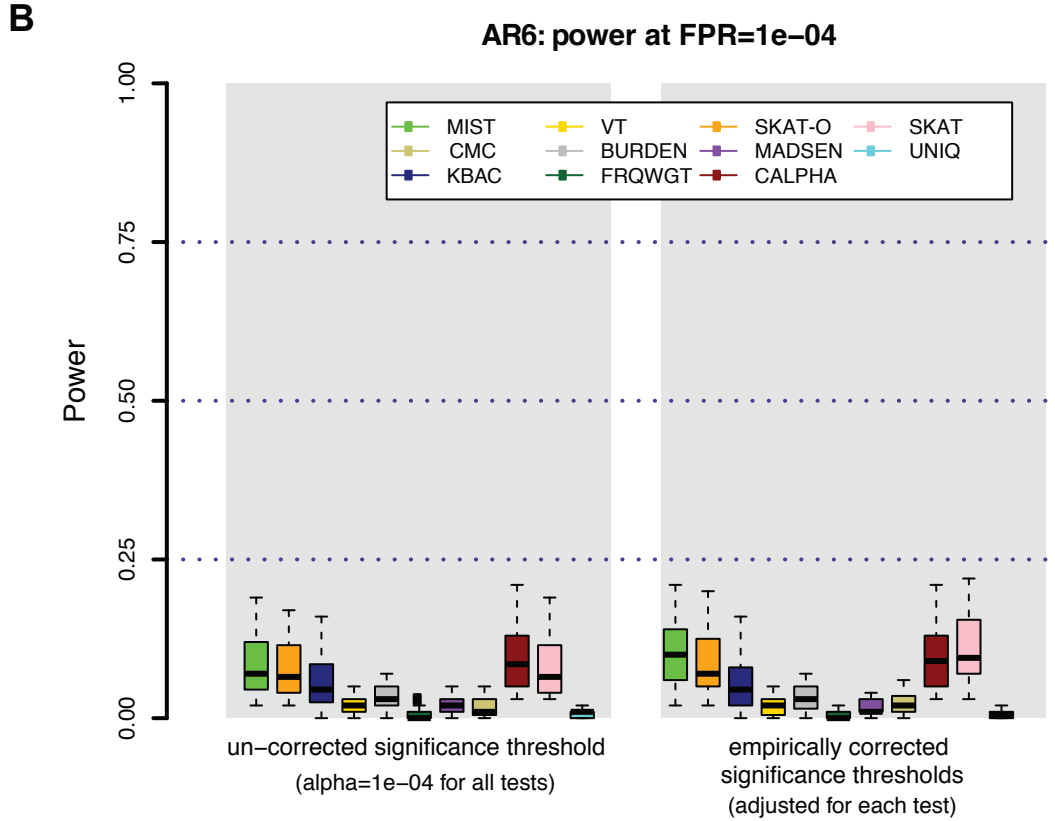

Supplement: pgen.1005165.s007.pdf [file pgen.1005165.s007.pdf]
