# Supplementary material for: The Power of Gene-Based Rare Variant Methods to Detect Disease-Associated Variation and Test Hypotheses About Complex Disease
Source: PubMed Central journal article supplement (PMC4407972; doi:10.1371/journal.pgen.1005165), 2015-04-23

**S7 Figure: Power of gene-based tests in 3K samples, as a function of significance threshold, under each simulated architecture.**

**A**

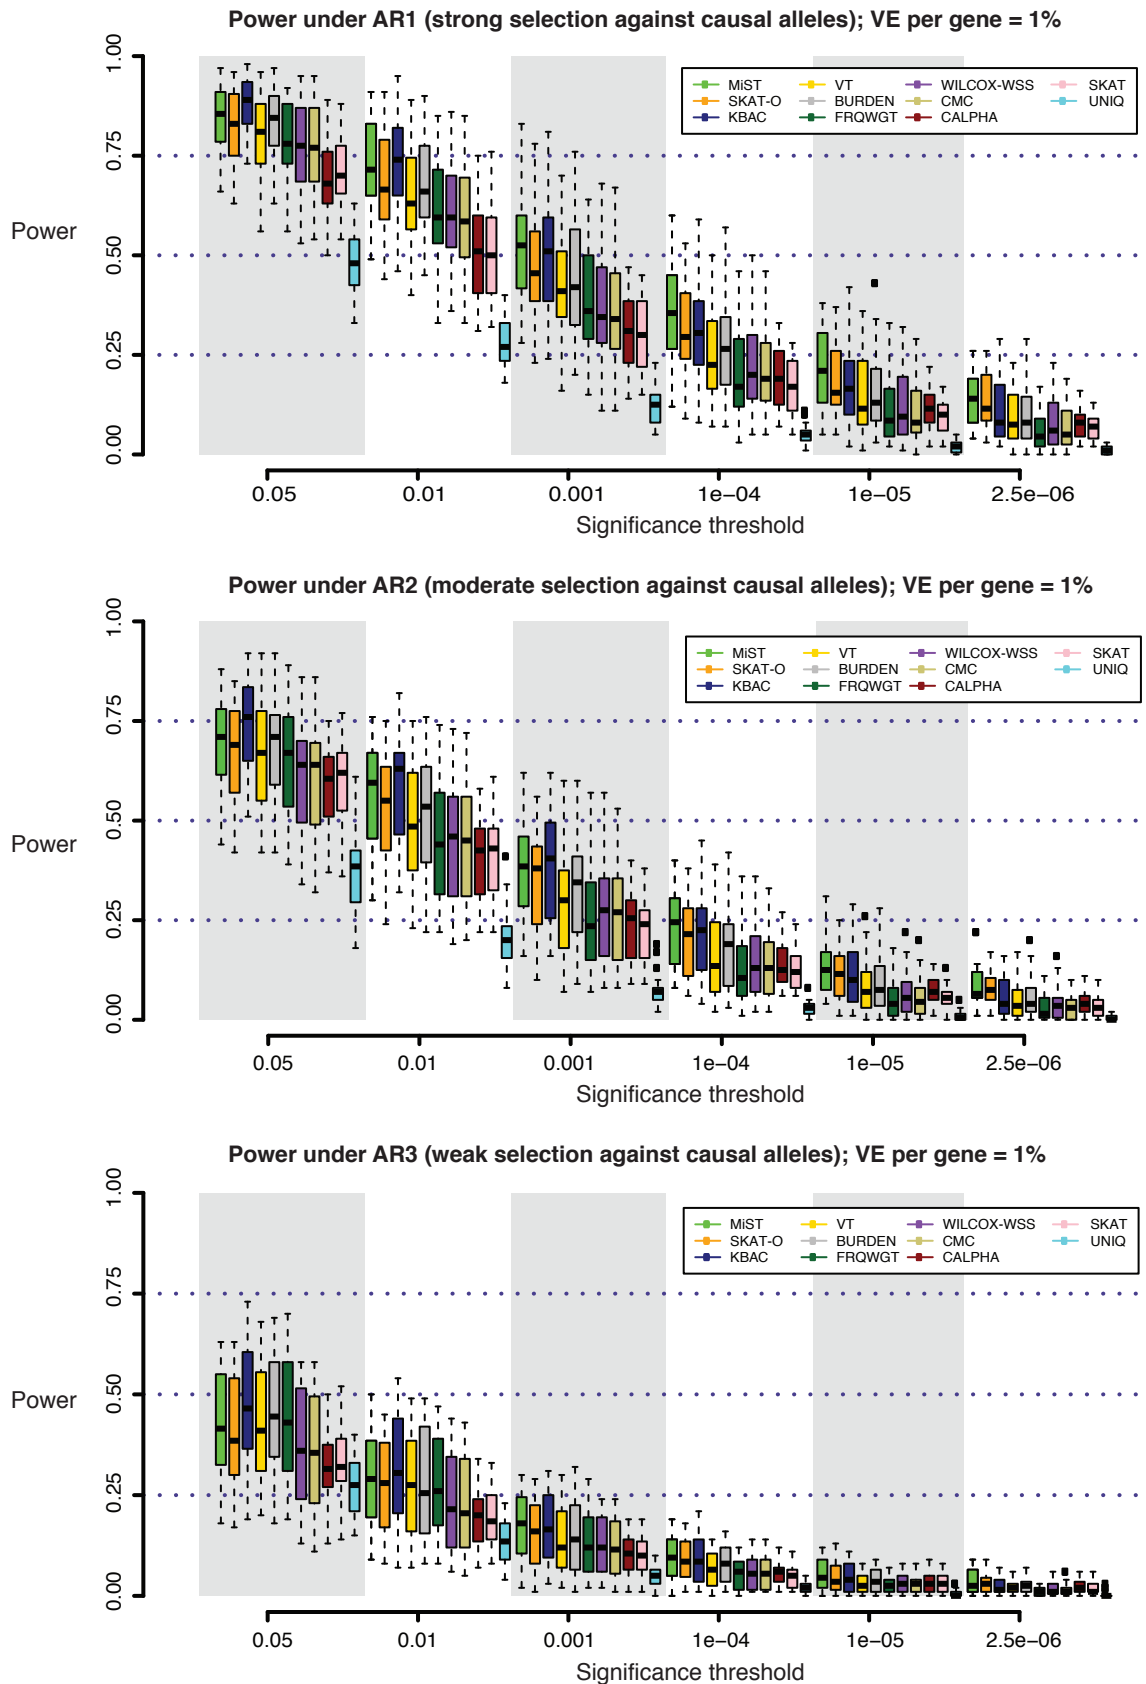

S7 Figure: Power of gene-based tests in 3K samples, as a function of significance threshold, under each simulated architecture (continued).

B

Power under AR4 (strong selection; same as AR1, but only MAF < 1% causal); VE per gene = 1%

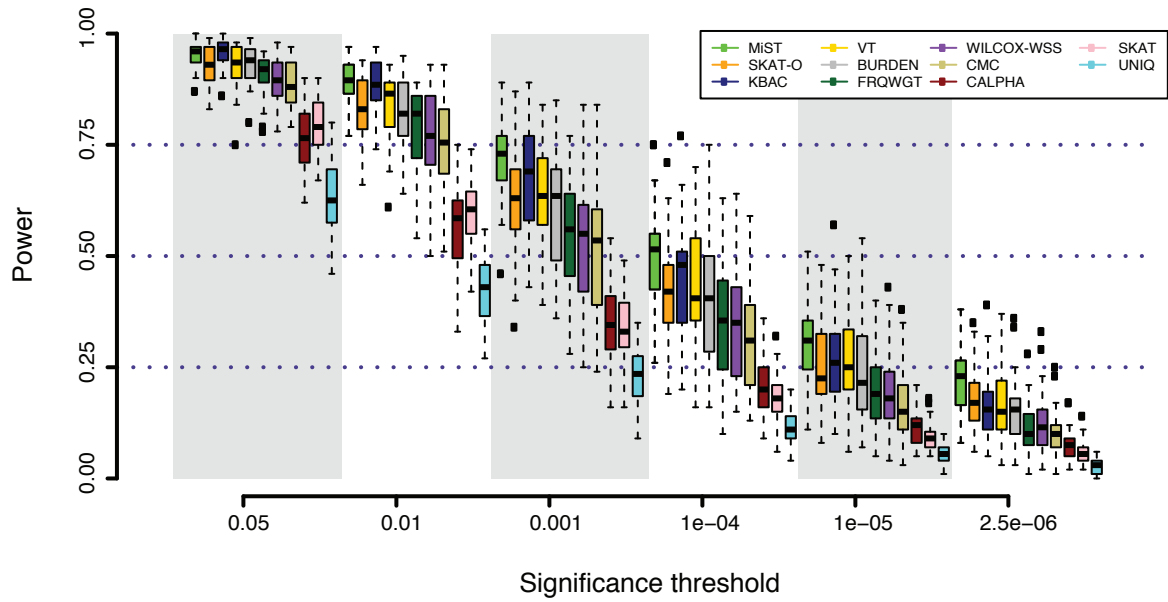

Power under AR5 (moderate selection; same as AR2, but only MAF < 1% causal); VE per gene = 1%

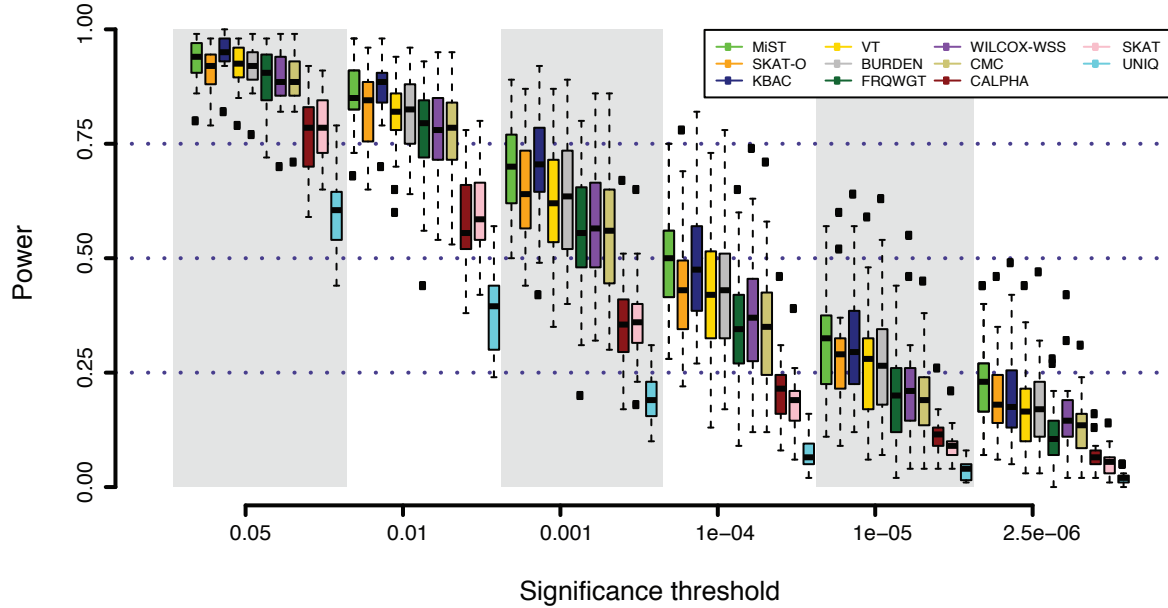

S7 Figure: Power of gene-based tests in 3K samples, as a function of significance threshold, under each simulated architecture (continued).

C

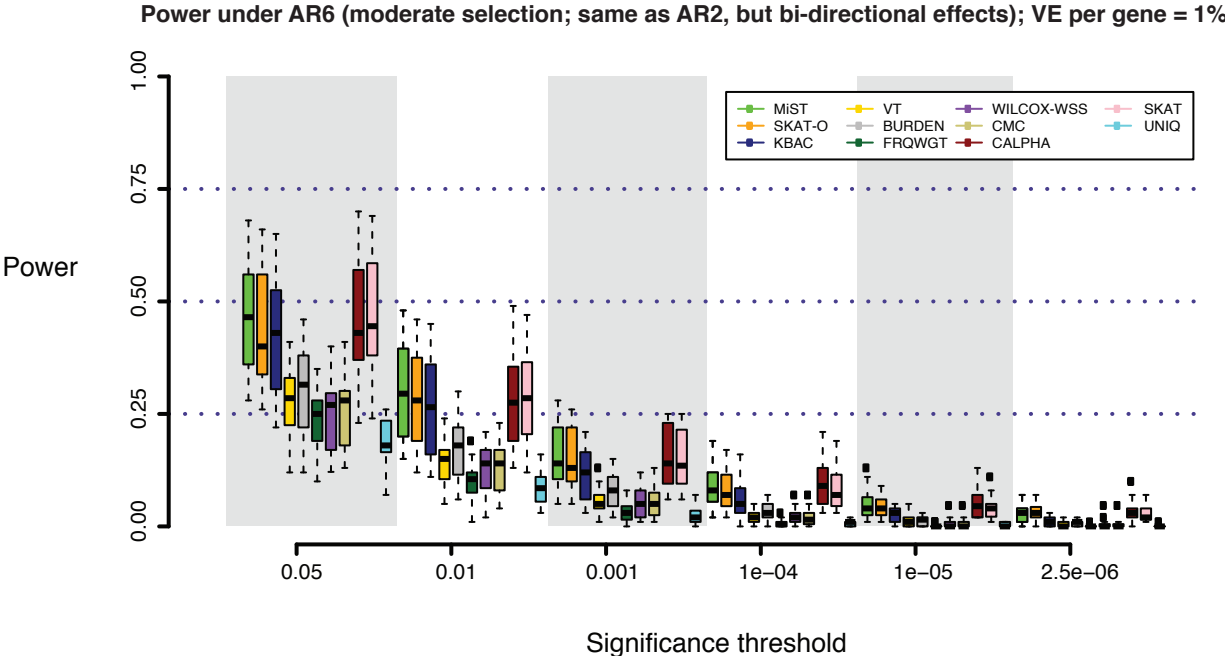

Supplement: pgen.1005165.s008.pdf [file pgen.1005165.s008.pdf]
