# Supplementary material for: The Power of Gene-Based Rare Variant Methods to Detect Disease-Associated Variation and Test Hypotheses About Complex Disease
Source: PubMed Central journal article supplement (PMC4407972; doi:10.1371/journal.pgen.1005165), 2015-04-23

**S10 Figure: Power of gene-based method (SKAT-O), as compared to single variant association testing under AR4, AR5, and AR6.**

**A AR4 (strong selection; only MAF<1% causal)**  
VE per gene = 1%, gene-based method = SKAT-O

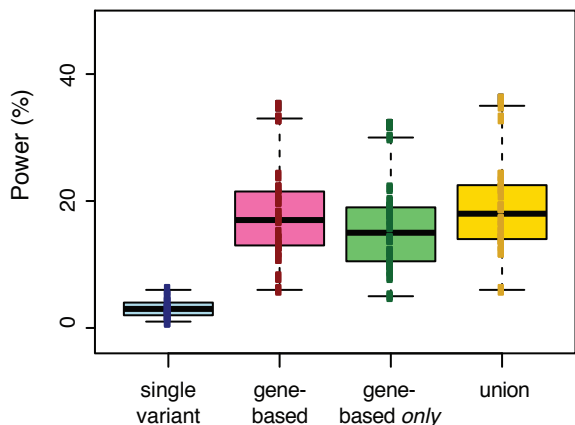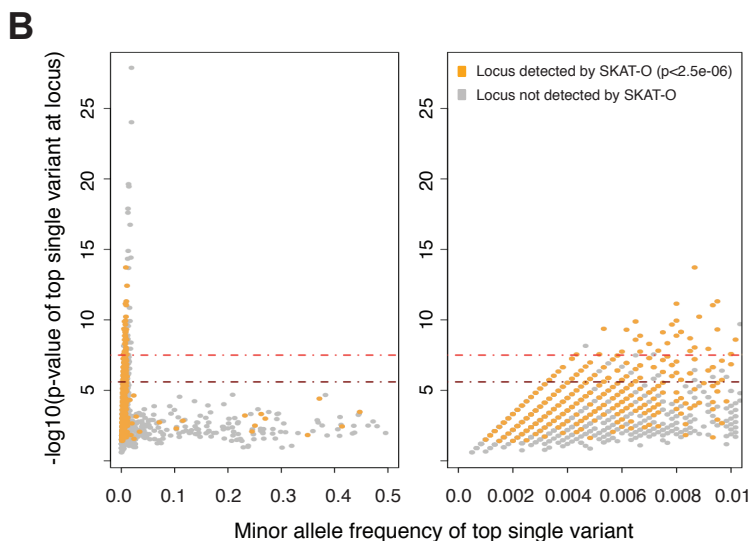

**C AR5 (moderate selection; only MAF<1% causal)**  
VE per gene = 1%, gene-based method = SKAT-O

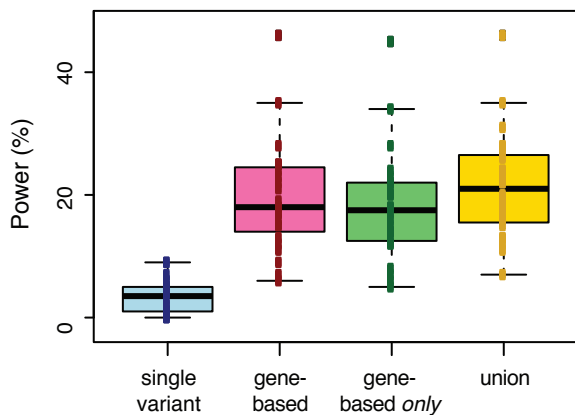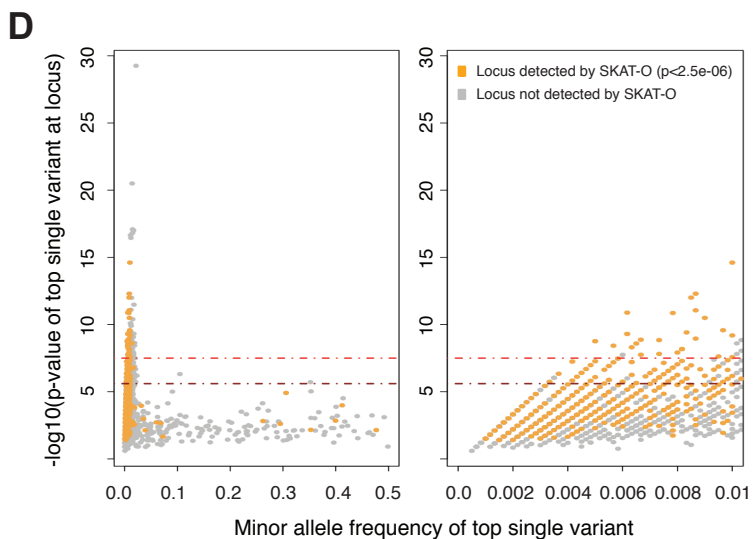

**E AR6 (moderate selection; bidirectional effects)**  
VE per gene = 1%, gene-based method = SKAT-O

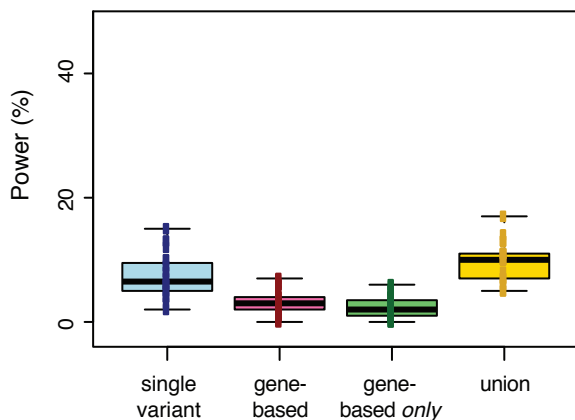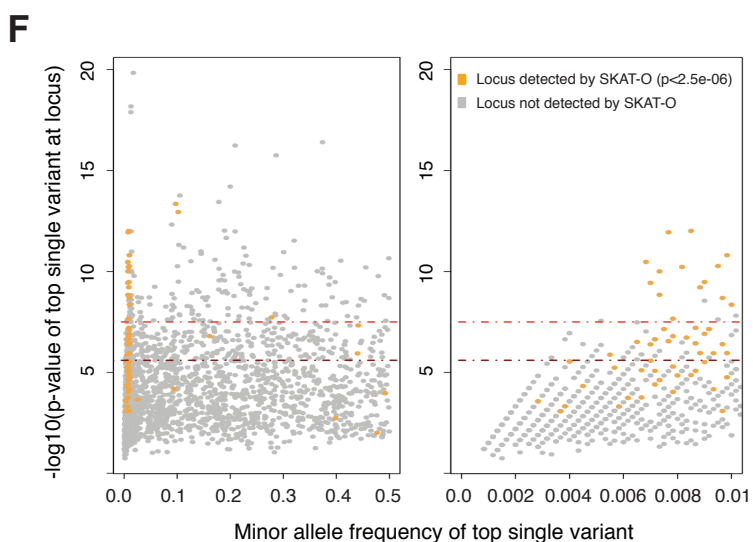

Supplement: pgen.1005165.s011.pdf [file pgen.1005165.s011.pdf]
