# Supplementary material for: The Power of Gene-Based Rare Variant Methods to Detect Disease-Associated Variation and Test Hypotheses About Complex Disease
Source: PubMed Central journal article supplement (PMC4407972; doi:10.1371/journal.pgen.1005165), 2015-04-23

S11 Figure: Power of gene-based tests as a function of locus effect size and sample size.

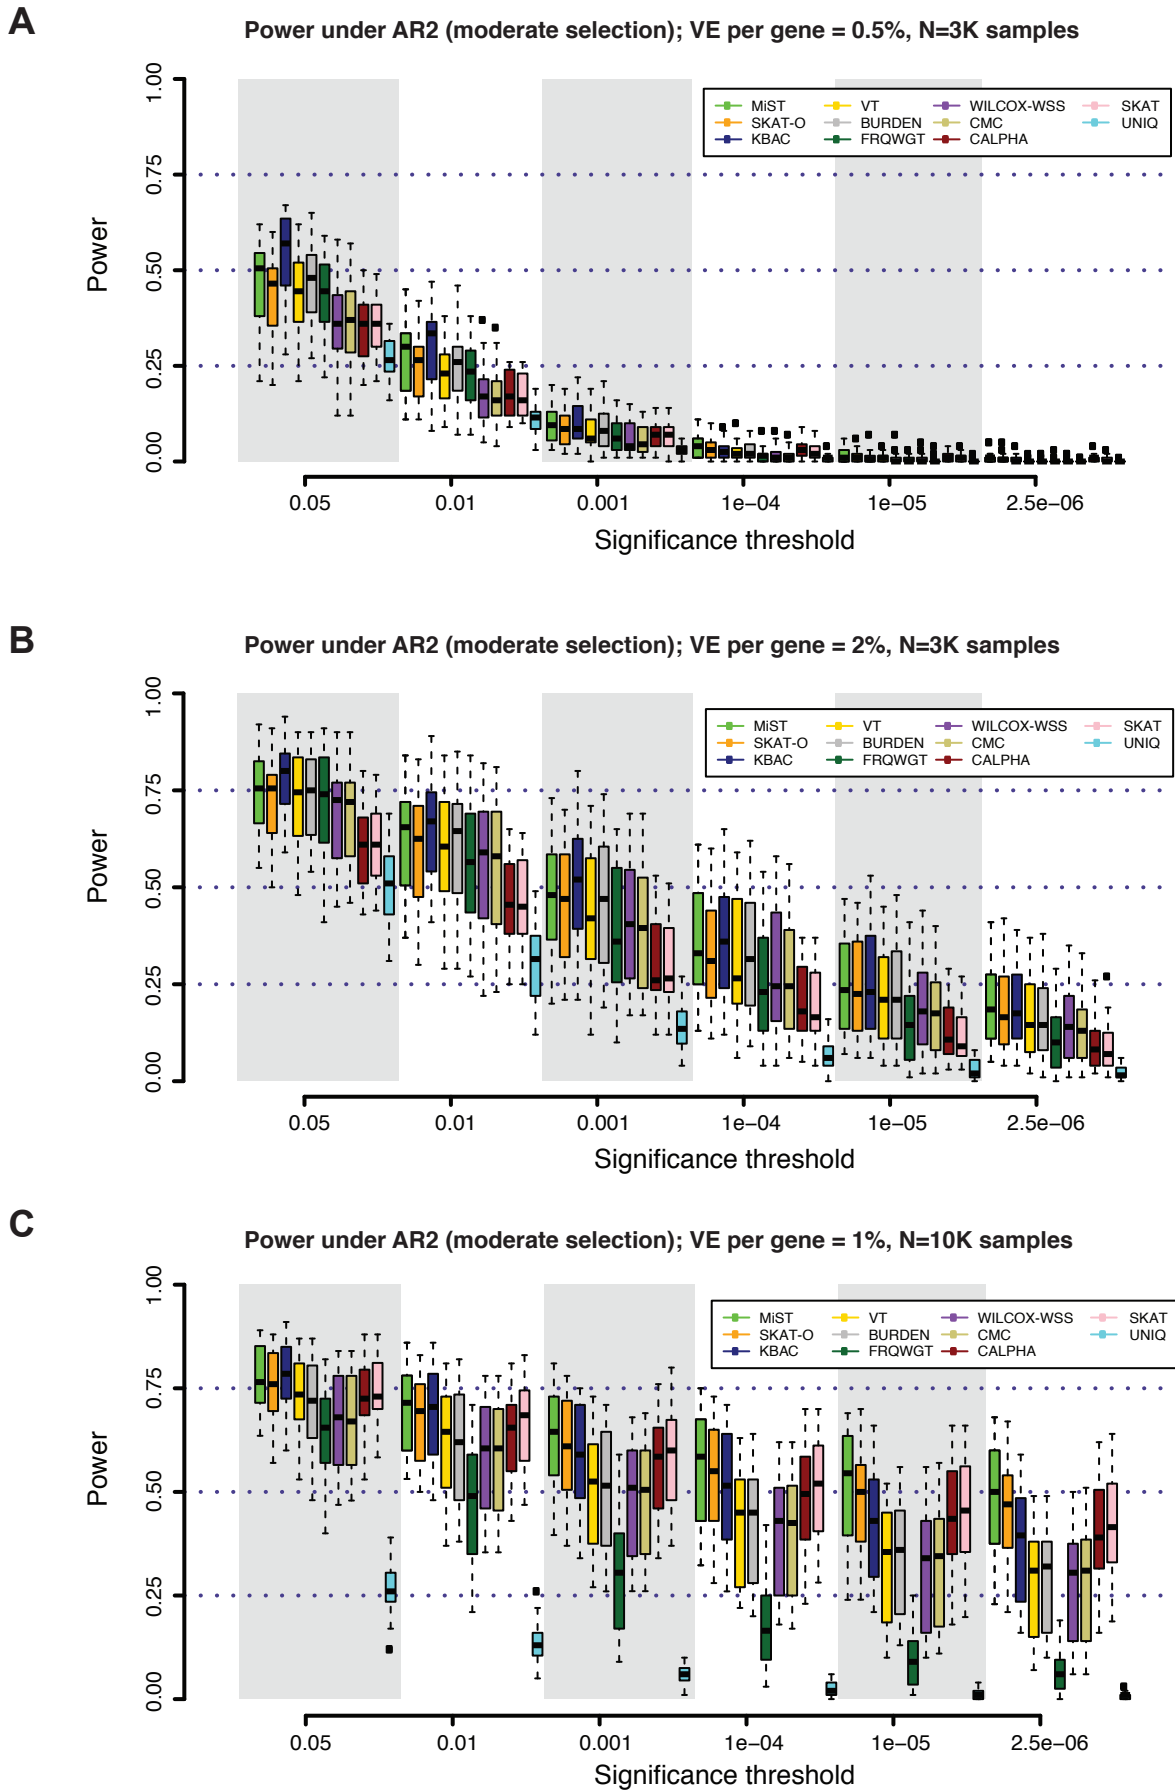

Supplement: pgen.1005165.s012.pdf [file pgen.1005165.s012.pdf]
