# Supplementary material for: The Power of Gene-Based Rare Variant Methods to Detect Disease-Associated Variation and Test Hypotheses About Complex Disease
Source: PubMed Central journal article supplement (PMC4407972; doi:10.1371/journal.pgen.1005165), 2015-04-23

**S12 Figure: Effect of increasing sample size on the simulated number of causal and total segregating variants per locus, and effect of cap on number of causal variants in HAPGEN2.**

**A** Number of variants with assigned effects and number of variants tested as a function of sample size

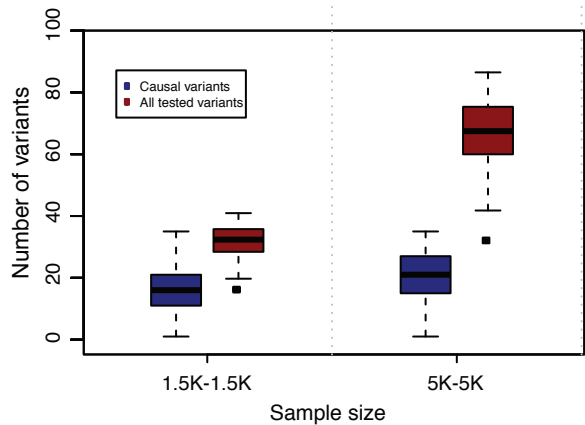

**B** Effect of cap on number of causal variants simulated in HAPGEN2 in 10K samples

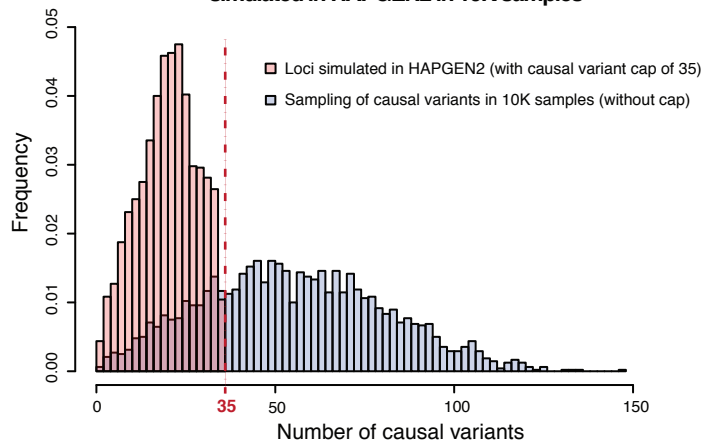

Supplement: pgen.1005165.s013.pdf [file pgen.1005165.s013.pdf]
