# Supplementary material for: The Power of Gene-Based Rare Variant Methods to Detect Disease-Associated Variation and Test Hypotheses About Complex Disease
Source: PubMed Central journal article supplement (PMC4407972; doi:10.1371/journal.pgen.1005165), 2015-04-23

**S13 Figure: Power of gene-based methods in 3K vs. 10K samples, as a function of ratio of causal to total number of variants per locus.**

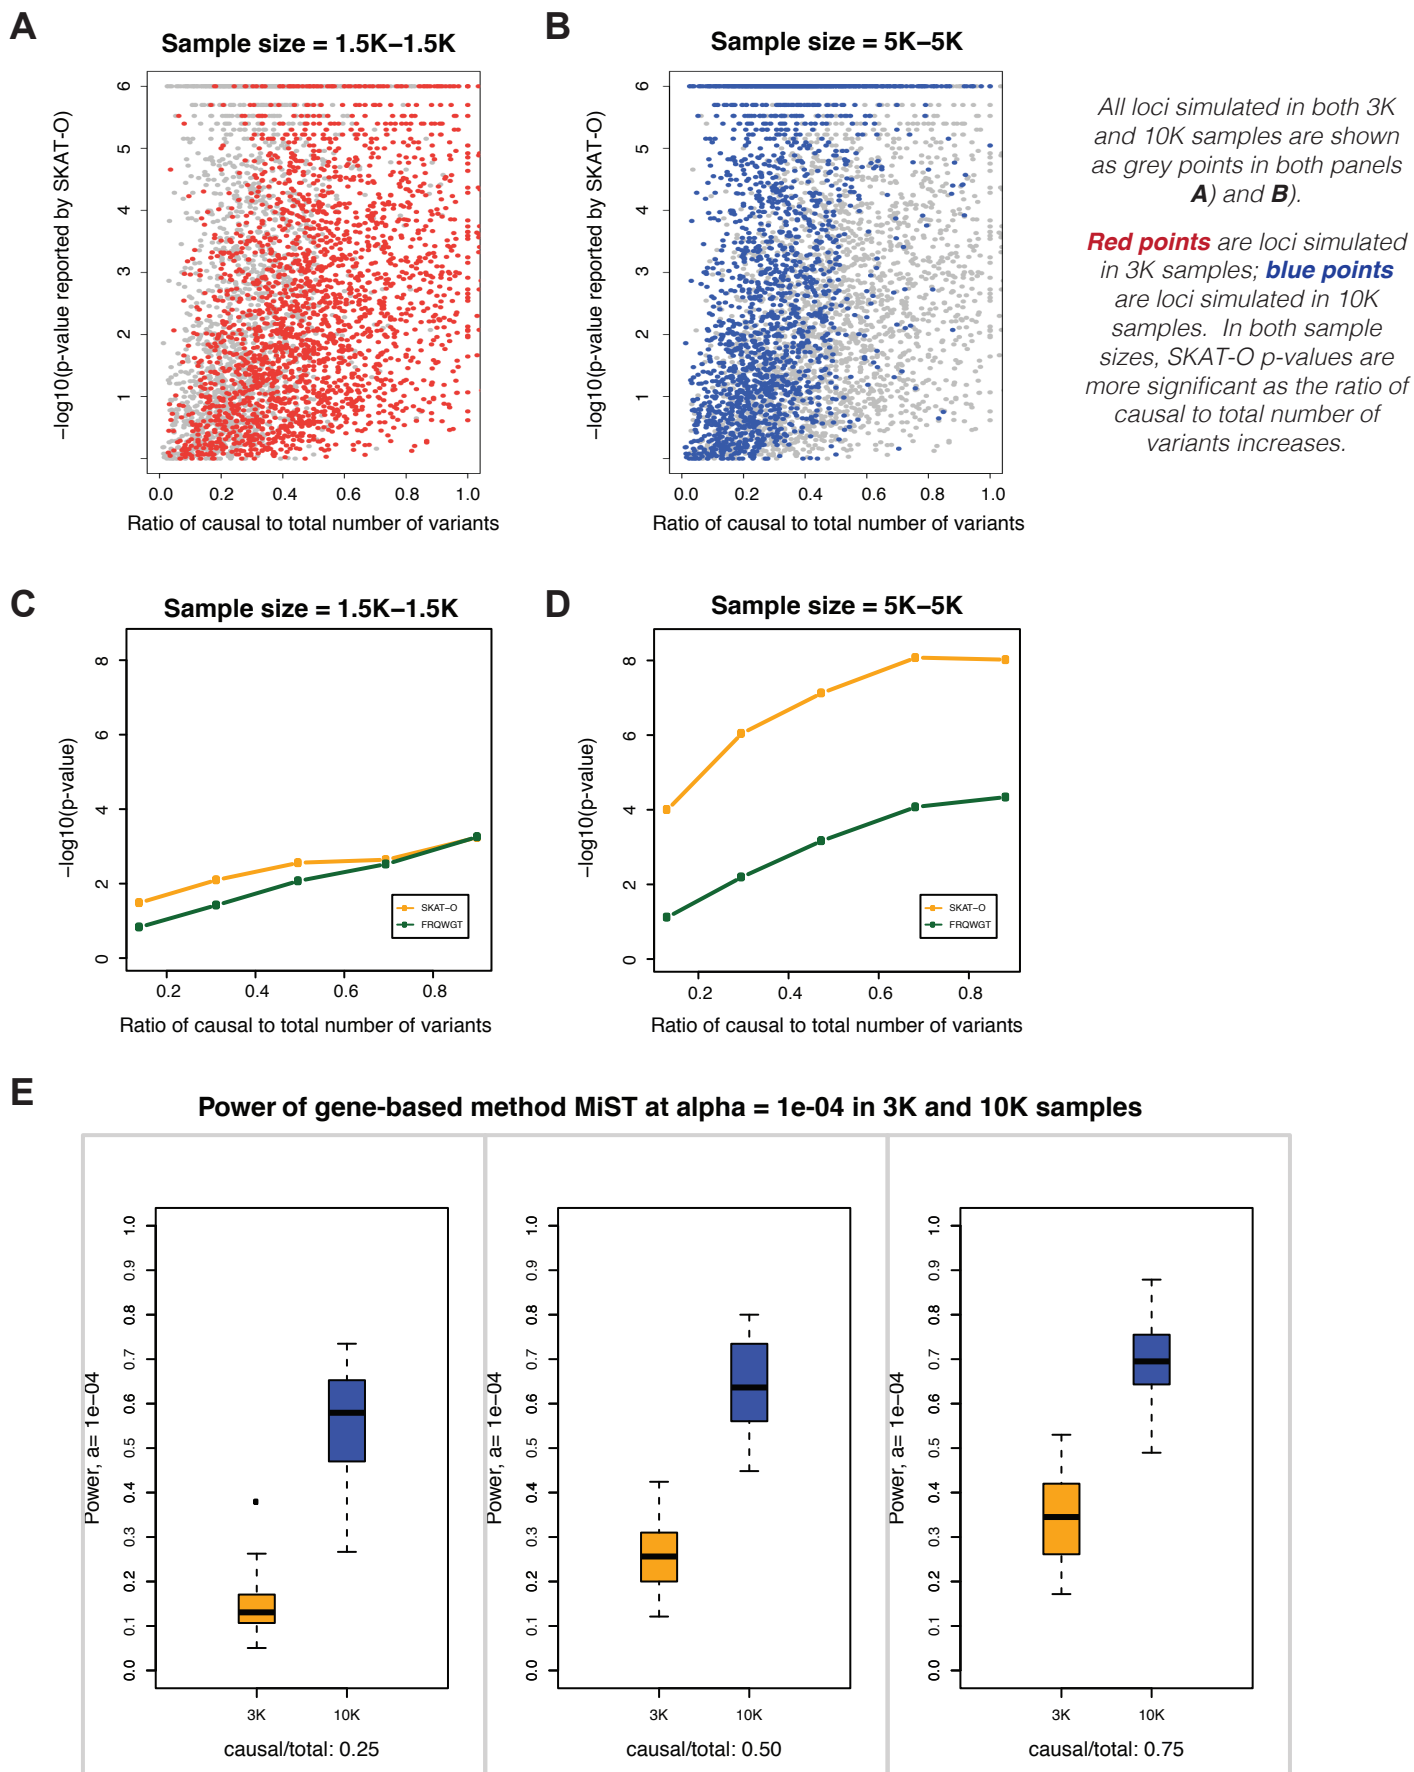

Supplement: pgen.1005165.s014.pdf [file pgen.1005165.s014.pdf]
