# Supplementary material for: The Power of Gene-Based Rare Variant Methods to Detect Disease-Associated Variation and Test Hypotheses About Complex Disease
Source: PubMed Central journal article supplement (PMC4407972; doi:10.1371/journal.pgen.1005165), 2015-04-23

**S14 Figure: Concordance between p-values reported by different gene-based association methods under each simulated architecture.**

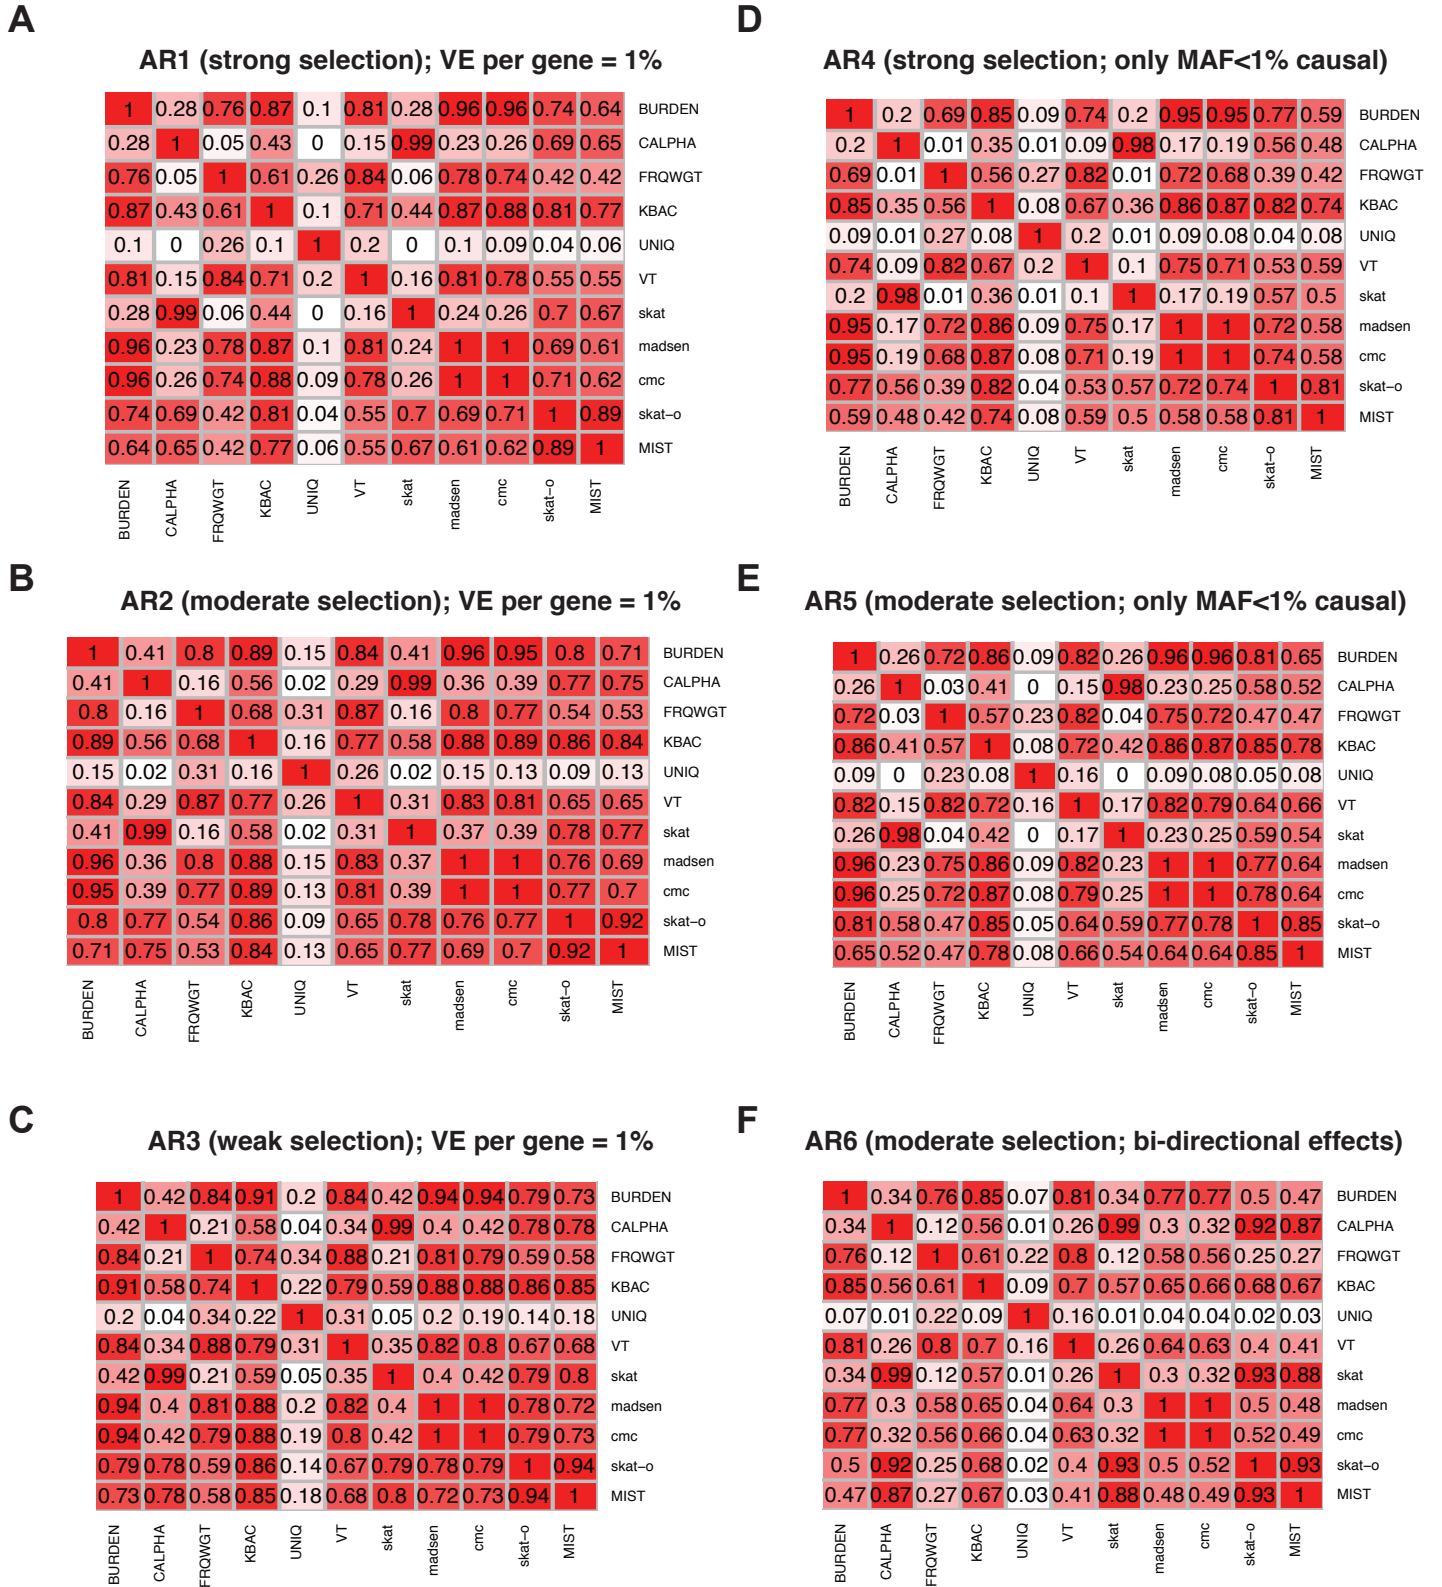

Supplement: pgen.1005165.s015.pdf [file pgen.1005165.s015.pdf]
