# Supplementary material for: The Power of Gene-Based Rare Variant Methods to Detect Disease-Associated Variation and Test Hypotheses About Complex Disease
Source: PubMed Central journal article supplement (PMC4407972; doi:10.1371/journal.pgen.1005165), 2015-04-23
Supplement: pgen.1005165.s017.pdf [file pgen.1005165.s017.pdf]

**S2 Table: Locus architectures modeled at simulated loci.**

| Architecture | Direction of effects               | Selection parameter<br>(from Agarwala et al)        | Description (also see S3 Figure)                                                                                |
|--------------|------------------------------------|-----------------------------------------------------|-----------------------------------------------------------------------------------------------------------------|
| AR1          | All deleterious                    | $\tau = 1$                                          | Rare variants (MAF<1%) explain >90% of heritability and have large additive effects relative to common variants |
| AR2          | All deleterious                    | $\tau = 0.5$                                        | Rare variants explain ~50% of heritability and have moderate additive effect sizes relative to common variants  |
| AR3          | All deleterious                    | $\tau = 0$                                          | Rare variants explain <15% of heritability and have additive effects comparable to common variants              |
| AR4          | All deleterious                    | $\tau = 1$ ,<br>all causal variants have MAF < 1%   | Same effect size distribution as AR1; but only rare (MAF<1%) are causal at the simulated locus                  |
| AR5          | All deleterious                    | $\tau = 0.5$ ,<br>all causal variants have MAF < 1% | Same effect size distribution as AR2; but only rare (MAF<1%) are causal at the simulated locus                  |
| AR6          | 50% deleterious,<br>50% protective | $\tau = 0.5$                                        | Same effect size distribution as AR2; but 50% of variants have protective effects on disease                    |
