# Supplementary material for: The Power of Gene-Based Rare Variant Methods to Detect Disease-Associated Variation and Test Hypotheses About Complex Disease
Source: PubMed Central journal article supplement (PMC4407972; doi:10.1371/journal.pgen.1005165), 2015-04-23
Supplement: pgen.1005165.s018.pdf [file pgen.1005165.s018.pdf]

**S3 Table: Power of ‘composite’ groups of gene-based association methods.**

| AR, VE%, D/M        | Starting test | Margin     | Tests (in order of inclusion)                               | Composite Sensitivity | Power (adj. p-value) | Mean power of single best test |
|---------------------|---------------|------------|-------------------------------------------------------------|-----------------------|----------------------|--------------------------------|
| AR1, 1%, D          | KBAC          | 100        | KBAC,CALPHA,UNIQ,VT                                         | 0.431                 | 0.348                | 0.359 (MiST)                   |
| AR1, 1%, D          | KBAC          | 10         | KBAC,MiST,VT,UNIQ,CALPHA,FRQWGT                             | 0.465                 | 0.360                | 0.359                          |
| AR1, 1%, D          | KBAC          | 1          | KBAC,MiST,VT,FRQWGT,CALPHA,UNIQ,BURDEN,SKATO                | 0.468                 | 0.365                | 0.359                          |
| AR1, 1%, D          | SKATO         | 100        | SKATO, VT,UNIQ,MiST                                         | 0.420                 | 0.356                | 0.359                          |
| <b>AR1, 1%, D</b>   | <b>SKATO</b>  | <b>10</b>  | <b>SKATO,VT,UNIQ,MiST,KBAC,FRQWGT</b>                       | <b>0.459</b>          | <b>0.373</b>         | <b>0.359</b>                   |
| AR1, 1%, D          | SKATO         | 1          | SKATO,KBAC,MiST,VT,FRQWGT,UNIQ,CALPHA,BURDEN                | 0.468                 | 0.365                | 0.359                          |
| AR1, 1%, D          | MiST          | 100        | MiST,CALPHA,UNIQ,VT                                         | 0.423                 | 0.346                | 0.359                          |
| AR1, 1%, D          | MiST          | 10         | MiST,VT,UNIQ,CALPHA,UNIQ,KBAC,FRQWGT                        | 0.465                 | 0.360                | 0.359                          |
| AR1, 1%, D          | MiST          | 1          | MiST,KBAC,VT,FRQWGT,CALPHA,UNIQ,BURDEN,SKATO                | 0.468                 | 0.365                | 0.359                          |
| AR2, 1%, D          | KBAC          | 100        | KBAC,CALPHA,UNIQ,FRQWGT                                     | 0.297                 | 0.229                | 0.231 (MiST)                   |
| AR2, 1%, D          | KBAC          | 10         | KBAC,CALPHA,UNIQ,FRQWGT,MiST                                | 0.315                 | 0.245                | 0.231                          |
| AR2, 1%, D          | KBAC          | 1          | KBAC,MiST,FRQWGT,CALPHA,UNIQ,BURDEN,VT,SKATO,WILCOX-WSS     | 0.327                 | 0.243                | 0.231                          |
| AR2, 1%, D          | SKATO         | 100        | SKATO,UNIQ,MiST                                             | 0.258                 | 0.245                | 0.231                          |
| <b>AR2, 1%, D</b>   | <b>SKATO</b>  | <b>10</b>  | <b>SKATO,VT,KBAC,UNIQ,FRQWGT,MiST</b>                       | <b>0.310</b>          | <b>0.245</b>         | <b>0.231</b>                   |
| AR2, 1%, D          | SKATO         | 1          | SKATO,KBAC,MiST,FRQWGT,CALPHA,UNIQ,BURDEN,VT,WILCOX-WSS     | 0.327                 | 0.243                | 0.231                          |
| AR2, 1%, D          | MiST          | 100        | MiST,CALPHA,UNIQ                                            | 0.257                 | 0.208                | 0.231                          |
| AR2, 1%, D          | MiST          | 10         | MiST,VT,KBAC,UNIQ,FRQWGT                                    | 0.308                 | 0.244                | 0.231                          |
| AR2, 1%, D          | MiST          | 1          | MiST,KBAC,FRQWGT,CALPHA,UNIQ,BURDEN,VT,SKATO,WILCOX-WSS     | 0.327                 | 0.243                | 0.231                          |
| AR3, 1%, D          | KBAC          | 100        | KBAC, UNIQ, CALPHA                                          | 0.120                 | 0.091                | 0.095 (MiST)                   |
| AR3, 1%, D          | KBAC          | 10         | KBAC,CALPHA,UNIQ,VT, WILCOX-WSS                             | 0.128                 | 0.097                | 0.095                          |
| AR3, 1%, D          | KBAC          | 1          | KBAC,MiST,FRQWGT,UNIQ,VT,CALPHA,BURDEN,SKAT,WILCOX-WSS,CMC  | 0.142                 | 0.103                | 0.095                          |
| AR3, 1%, D          | SKATO         | 100        | SKATO,VT,UNIQ,CALPHA                                        | 0.115                 | 0.090                | 0.095                          |
| AR3, 1%, D          | SKATO         | 10         | SKATO,UNIQ,VT,CALPHA,KBAC                                   | 0.130                 | 0.097                | 0.095                          |
| AR3, 1%, D          | SKATO         | 1          | SKATO,KBAC,MiST,FRQWGT,UNIQ,VT,CALPHA,BURDEN,WILCOX-WSS,CMC | 0.143                 | 0.103                | 0.095                          |
| <b>AR3, 1%, D</b>   | <b>MiST</b>   | <b>100</b> | <b>MiST,UNIQ,BURDEN</b>                                     | <b>0.123</b>          | <b>0.110</b>         | <b>0.095</b>                   |
| AR3, 1%, D          | MiST          | 10         | MiST,UNIQ,BURDEN,VT                                         | 0.126                 | 0.102                | 0.095                          |
| AR3, 1%, D          | MiST          | 1          | MiST,KBAC,FRQWGT,UNIQ,VT,CALPHA,BURDEN,SKAT,WILCOX-WSS,CMC  | 0.142                 | 0.103                | 0.095                          |
| AR5, 1%, D          | KBAC          | 100        | KBAC,UNIQ,CALPHA,VT                                         | 0.593                 | 0.484                | 0.500 (MiST)                   |
| AR5, 1%, D          | KBAC          | 10         | KBAC,MiST,UNIQ,VT,FRQWGT,CALPHA                             | 0.635                 | 0.499                | 0.5                            |
| AR5, 1%, D          | KBAC          | 1          | KBAC,MiST,VT,UNIQ,BURDEN,FRQWGT,CALPHA,SKATO                | 0.639                 | 0.508                | 0.5                            |
| AR5, 1%, D          | SKATO         | 100        | SKATO,UNIQ,VT                                               | 0.550                 | 0.470                | 0.5                            |
| <b>AR5, 1%, D</b>   | <b>SKATO</b>  | <b>10</b>  | <b>SKATO,VT,UNIQ,KBAC,MiST,FRQWGT</b>                       | <b>0.630</b>          | <b>0.520</b>         | <b>0.5</b>                     |
| AR5, 1%, D          | SKATO         | 1          | SKATO,VT,MiST,KBAC,UNIQ,BURDEN,FRQWGT,CALPHA                | 0.639                 | 0.508                | 0.5                            |
| AR5, 1%, D          | MiST          | 100        | MiST,CALPHA,UNIQ,VT                                         | 0.586                 | 0.492                | 0.5                            |
| AR5, 1%, D          | MiST          | 10         | MiST,UNIQ,KBAC,VT,FRQWGT,CALPHA                             | 0.635                 | 0.499                | 0.5                            |
| AR5, 1%, D          | MiST          | 1          | MiST,VT,KBAC,UNIQ,BURDEN,FRQWGT,CALPHA,SKATO                | 0.639                 | 0.508                | 0.5                            |
| AR6, 1%, D          | KBAC          | 100        | KBAC,CALPHA,UNIQ                                            | 0.546                 | 0.465                | 0.498 (MiST)                   |
| AR6, 1%, D          | KBAC          | 10         | KBAC,MiST,UNIQ,FRQWGT,CALPHA,VT                             | 0.627                 | 0.510                | 0.498                          |
| AR6, 1%, D          | KBAC          | 1          | KBAC,MiST,FRQWGT,VT,UNIQ,CALPHA,BURDEN,SKATO                | 0.635                 | 0.515                | 0.498                          |
| AR6, 1%, D          | SKATO         | 100        | SKATO,UNIQ,VT                                               | 0.530                 | 0.455                | 0.498                          |
| <b>AR6, 1%, D</b>   | <b>SKATO</b>  | <b>10</b>  | <b>SKATO,VT,UNIQ,KBAC,MiST</b>                              | <b>0.615</b>          | <b>0.518</b>         | <b>0.498</b>                   |
| AR6, 1%, D          | SKATO         | 1          | SKATO,KBAC,VT,MiST,FRQWGT,UNIQ,CALPHA,BURDEN                | 0.635                 | 0.515                | 0.498                          |
| AR6, 1%, D          | MiST          | 100        | MiST,CALPHA,UNIQ                                            | 0.525                 | 0.451                | 0.498                          |
| AR6, 1%, D          | MiST          | 10         | MiST,VT,UNIQ,KBAC,CALPHA                                    | 0.615                 | 0.516                | 0.498                          |
| AR6, 1%, D          | MiST          | 1          | MiST,KBAC,FRQWGT,VT,UNIQ,CALPHA,BURDEN,SKATO                | 0.635                 | 0.515                | 0.498                          |
| AR2, 1%, M          | KBAC          | 100        | KBAC,CALPHA,UNIQ                                            | 0.113                 | 0.088                | 0.093 (CALPHA)                 |
| AR2, 1%, M          | KBAC          | 10         | KBAC,CALPHA,UNIQ,MiST                                       | 0.118                 | 0.094                | 0.093                          |
| AR2, 1%, M          | KBAC          | 1          | KBAC,CALPHA,MiST,UNIQ,BURDEN,VT,SKAT                        | 0.121                 | 0.089                | 0.093                          |
| <b>AR2, 1%, M</b>   | <b>SKATO</b>  | <b>100</b> | <b>SKATO,UNIQ,MiST</b>                                      | <b>0.097</b>          | <b>0.094</b>         | <b>0.093 (CALPHA)</b>          |
| AR2, 1%, M          | SKATO         | 10         | SKATO,UNIQ,MiST,FRQWGT                                      | 0.098                 | 0.083                | 0.093                          |
| AR2, 1%, M          | SKATO         | 1          | SKATO,CALPHA,KBAC,MiST,UNIQ,BURDEN,VT,SKAT                  | 0.121                 | 0.089                | 0.093                          |
| AR2, 1%, M          | MiST          | 100        | MiST,CALPHA,UNIQ                                            | 0.109                 | 0.086                | 0.093                          |
| AR2, 1%, M          | MiST          | 10         | MiST,UNIQ,KBAC,CALPHA                                       | 0.118                 | 0.094                | 0.093                          |
| AR2, 1%, M          | MiST          | 1          | MiST,CALPHA,KBAC,UNIQ,BURDEN,VT,SKAT                        | 0.121                 | 0.089                | 0.093                          |
| AR2, 0.5%, D        | KBAC          | 100        | KBAC,UNIQ,CALPHA,VT                                         | 0.065                 | 0.040                | 0.041 (MiST)                   |
| AR2, 0.5%, D        | KBAC          | 10         | KBAC,CALPHA,UNIQ,VT,MiST                                    | 0.071                 | 0.042                | 0.041                          |
| AR2, 0.5%, D        | KBAC          | 1          | KBAC,MiST,CALPHA,VT,BURDEN,UNIQ,FRQWGT,SKATO                | 0.075                 | 0.039                | 0.041                          |
| AR2, 0.5%, D        | SKATO         | 100        | SKATO,UNIQ,VT                                               | 0.050                 | 0.034                | 0.041                          |
| AR2, 0.5%, D        | SKATO         | 10         | SKATO,VT,UNIQ,MiST,KBAC                                     | 0.065                 | 0.040                | 0.041                          |
| AR2, 0.5%, D        | SKATO         | 1          | SKATO,MiST,KBAC,VT,CALPHA,BURDEN,UNIQ,FRQWGT                | 0.075                 | 0.039                | 0.041                          |
| <b>AR2, 0.5%, D</b> | <b>MiST</b>   | <b>100</b> | <b>MiST,UNIQ,BURDEN</b>                                     | <b>0.057</b>          | <b>0.047</b>         | <b>0.041</b>                   |
| AR2, 0.5%, D        | MiST          | 10         | MiST,UNIQ,KBAC,VT                                           | 0.064                 | 0.038                | 0.041                          |
| AR2, 0.5%, D        | MiST          | 1          | MiST,KBAC,CALPHA,VT,BURDEN,UNIQ,FRQWGT,SKATO                | 0.075                 | 0.039                | 0.041                          |
